# Supplementary material for: Genetic characterization of Angiostrongylus larvae and their intermediate host, Achatina fulica, in Thailand
Source: PubMed Central journal article supplement (PMC6764694; doi:10.1371/journal.pone.0223257), 2019-09-27
Supplement: pone.0223257.s002.pdf [file pone.0223257.s002.pdf]

**S1 Table.** Number of *Achatina fulica* used for artificial digestion method collected across Thailand.

| <b>Locality</b>          | <b>No. of snail for artificial digestion method</b> | <b>Result</b>                | <b>No. of larvae</b> |
|--------------------------|-----------------------------------------------------|------------------------------|----------------------|
| <b><u>North</u></b>      |                                                     |                              |                      |
| Uttaradit                | 2                                                   | N                            |                      |
| Chiang Rai               | 21                                                  | P ( <i>A. malaysiensis</i> ) | 1,269                |
| Chiang Mai               | 3                                                   | N                            |                      |
| Nan                      | 22                                                  | N                            |                      |
| Phrae                    | 1                                                   | P ( <i>A. malaysiensis</i> ) | 13                   |
|                          | 29                                                  | N                            |                      |
| <b><u>Central</u></b>    |                                                     |                              |                      |
| Phitsanulok              | 3                                                   | N                            |                      |
| Phetchabun               | 5                                                   | N                            |                      |
| Bangkok                  | 30                                                  | N                            |                      |
| Lop Buri                 | 1                                                   | N                            |                      |
| Phra Nakhon Si Ayutthaya | 27                                                  | N                            |                      |
| Nakhon Sawan             | 31                                                  | N                            |                      |
| <b><u>East</u></b>       |                                                     |                              |                      |
| Rayong                   | 12                                                  | N                            |                      |
| <b><u>Northeast</u></b>  |                                                     |                              |                      |
| Nakhon Ratchasima        | 2                                                   | N                            |                      |
| Buri Ram                 | 15                                                  | N                            |                      |
| Maha Sarakham            | 17                                                  | N                            |                      |
| Chaiyaphum               | 30                                                  | P ( <i>A. cantonensis</i> )  | 313                  |
|                          | 9                                                   | N                            |                      |
| Udon Thani               | 6                                                   | N                            |                      |
| Nakhon Phanom            | 3                                                   | N                            |                      |
| <b><u>South</u></b>      |                                                     |                              |                      |
| Pattani                  | 30                                                  | N                            |                      |
| Chumphon                 | 11                                                  | N                            |                      |
| Surat Thani              | 21                                                  | N                            |                      |
| <b><u>West</u></b>       |                                                     |                              |                      |
| Prachuap Khiri Khan      | 12                                                  | N                            |                      |

P, Positive; N, negative.
